# Supplementary material for: Ultra-highly stretchable and anisotropic SEBS/F127 fiber films equipped with an adaptive deformable carbon nanotube layer for dual-mode strain sensing
Source: Royal Society of Chemistry journal article supplement (doi:10.1039/d1ta04563f), 2021-01-01
Supplement: d1ta04563f1.pdf [file d1ta04563f1.pdf]

**Ultra-Highly Stretchable and Anisotropic SEBS/F127 Fiber Films Equipped  
with Adaptive Deformable Carbon Nanotube Layer for Dual-Mode Strain  
Sensing**

Jiancheng Dong,<sup>a</sup> Le Li,<sup>a</sup> Chao Zhang,<sup>b</sup> Piming Ma,<sup>a</sup> Weifu Dong,<sup>a</sup> Yunpeng Huang<sup>\*a</sup>  
and Tianxi Liu<sup>\*a</sup>

<sup>a</sup> Key Laboratory of Synthetic and Biological Colloids, Ministry of Education, School  
of Chemical and Material Engineering, Jiangnan University, Wuxi, 214122, China

<sup>b</sup> State Key Laboratory for Modification of Chemical Fibers and Polymer Materials,  
College of Materials Science and Engineering, Donghua University, Shanghai, 201620,  
China

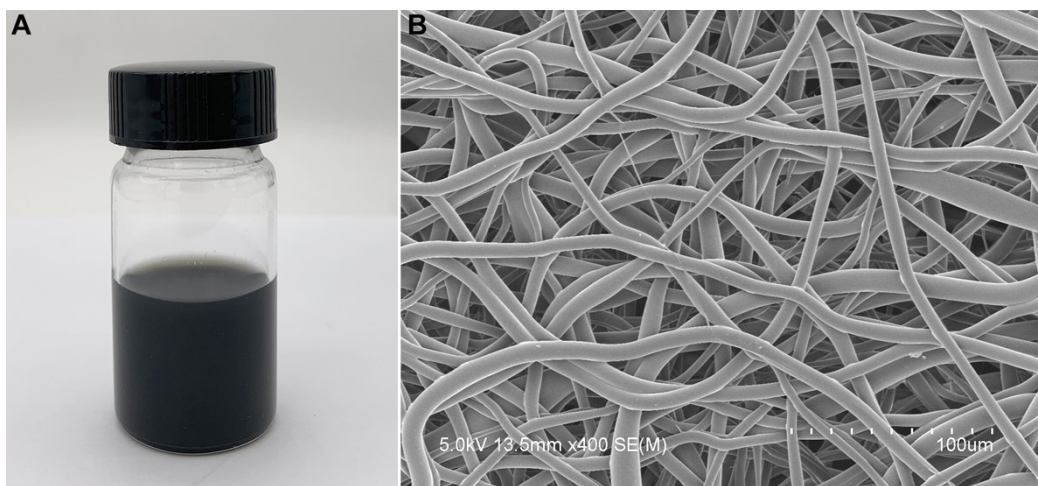

Figure S1. (A) Digital photograph of CNTs dispersion. (B) SEM image of isotropic SEBS/F127-15wt.% fiber film.

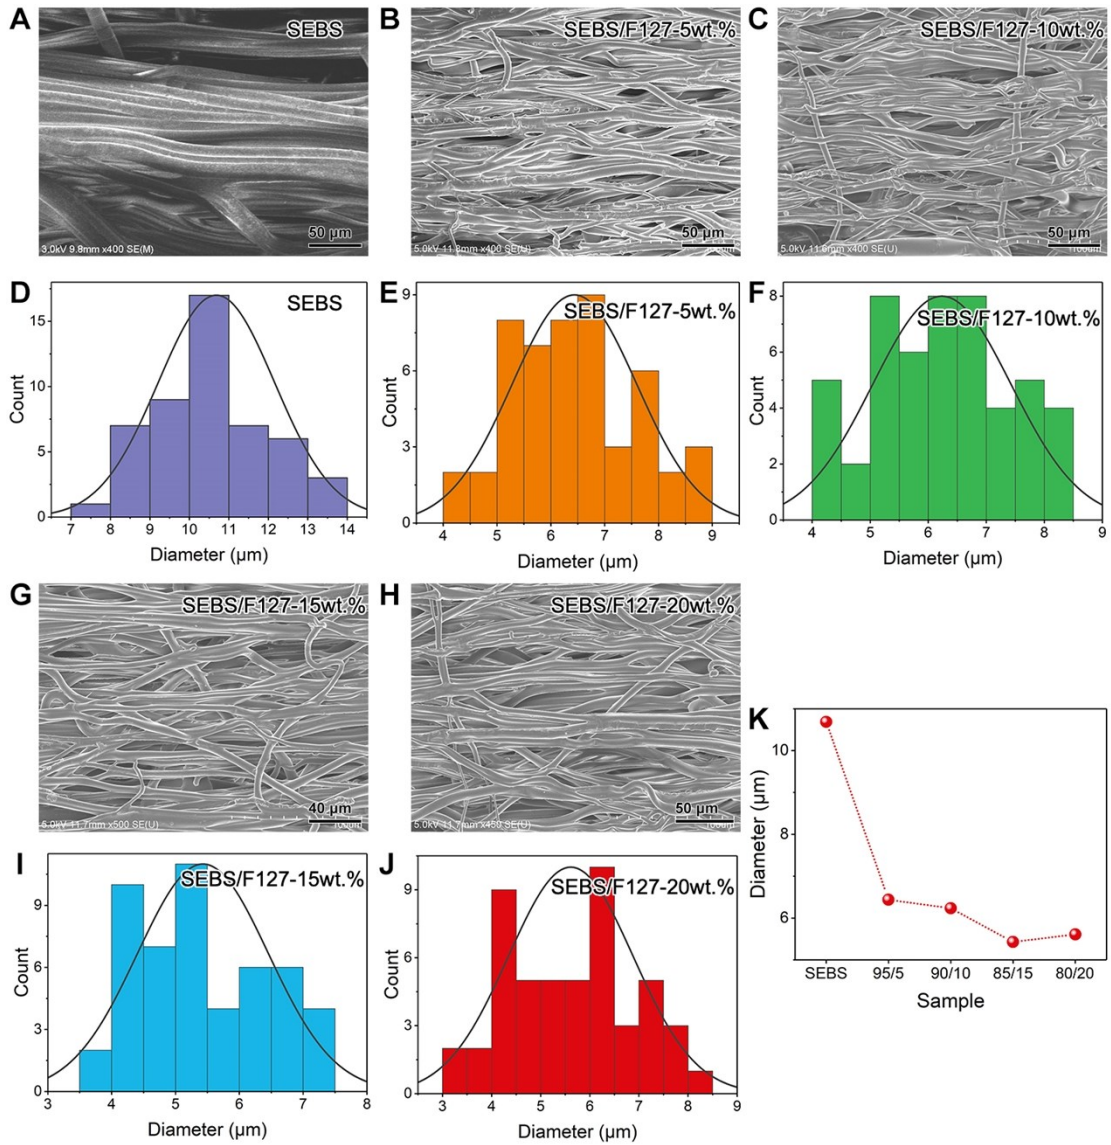

Figure S2. (A-J) SEM images and corresponding diameter distribution diagrams of SEBS fiber film and SEBS/F127 composite films with different F127 mass fractions.

(K) A plot showing the mean fiber diameter versus F127 blending fractions.

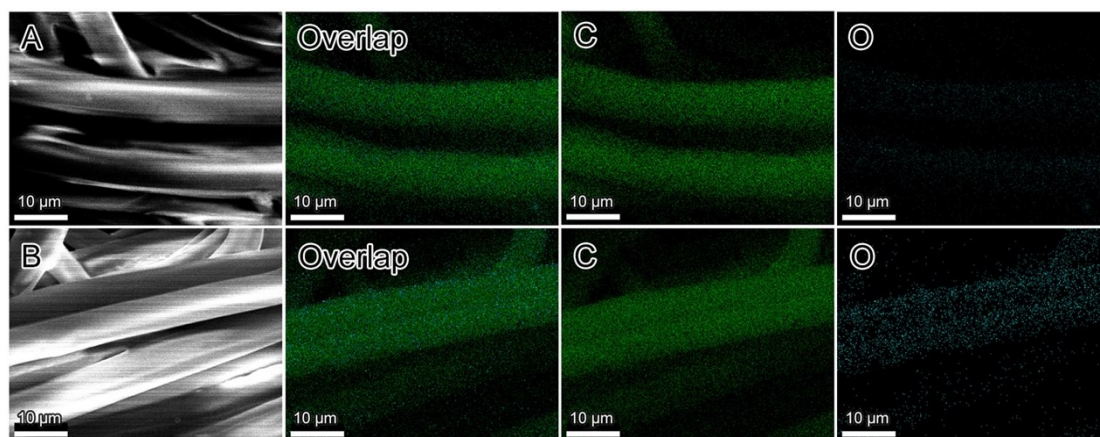

Figure S3. Elemental mapping of (A) pure SEBS and (B) SEBS/F127-15 wt.% fibrous film.

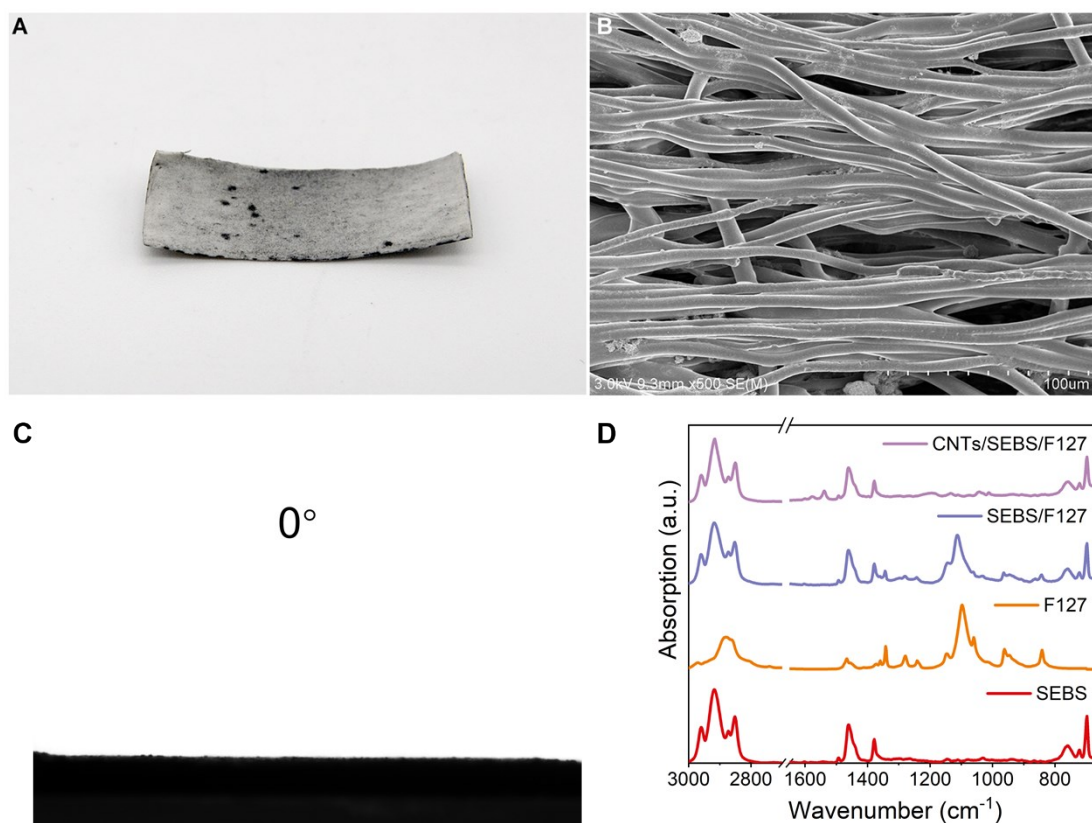

Figure S4. (A) Digital image and (B) corresponding SEM image of electrospun SEBS fiber film treated with CNTs dispersion; (C) water contact angle of CNT/SEBS/F127 fiber film ( $0^\circ$ ); (D) FTIR spectra of pure SEBS, F127, SEBS/F127 and CNT/SEBS/F127 fiber films.

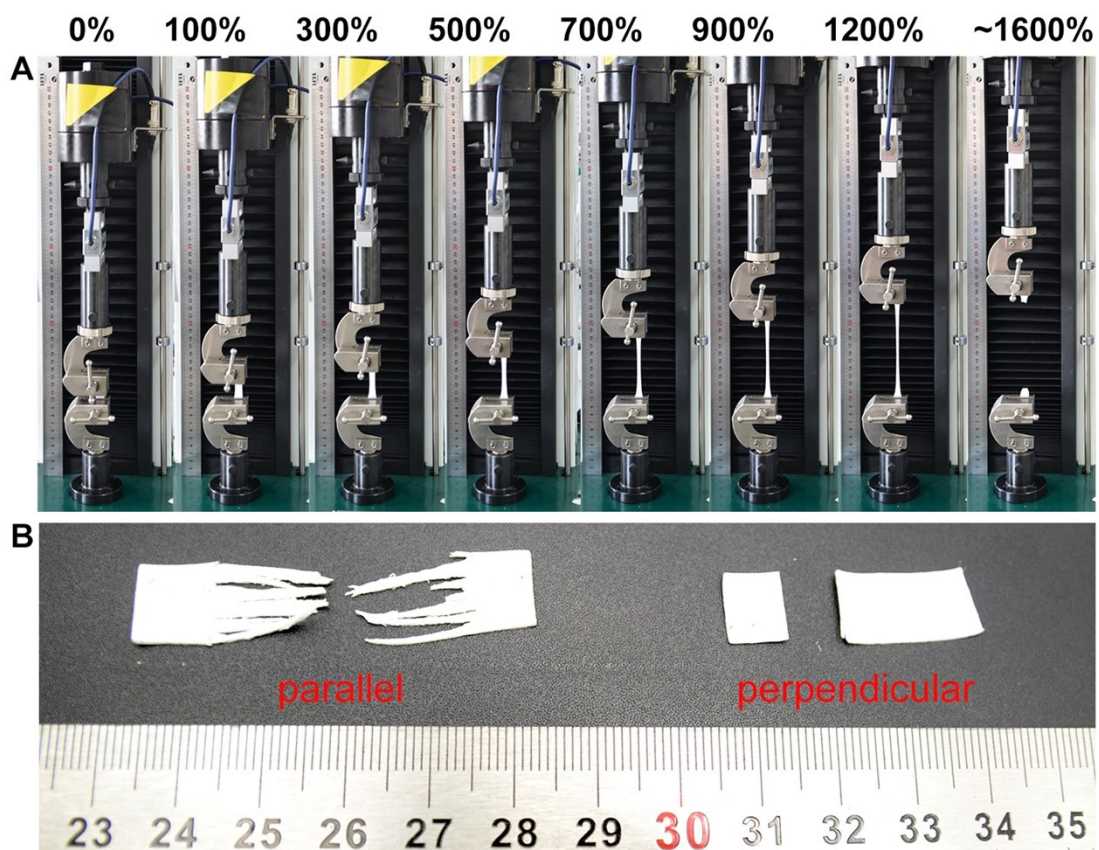

Figure S5. (A) Typical digital images of tensile tests of composite SEBS/F127 fibrous film (broke at elongation of ~1600%). (B) Digital images of fractured SEBS/F127 film stretched in parallel and perpendicular direction.

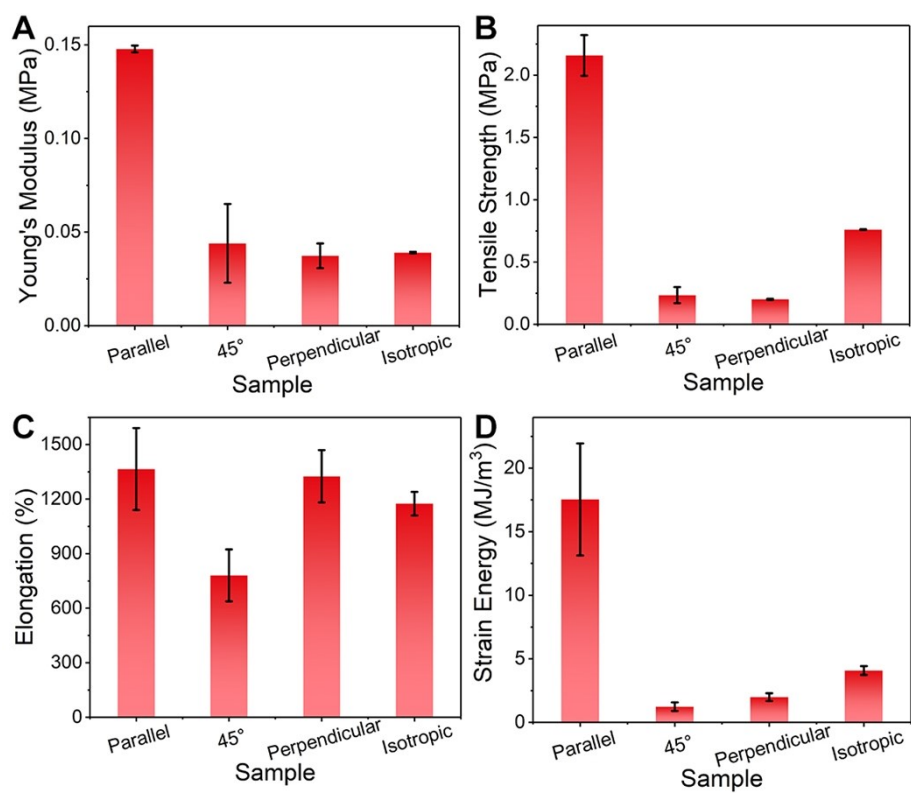

Figure S6. (A) Young's modulus, (B) tensile strength, (C) elongation and (D) strain energy of SEBS/F127-15 wt.% fiber films (parallel, 45° and perpendicular direction) and isotropic SEBS/F127-15 wt.% film.

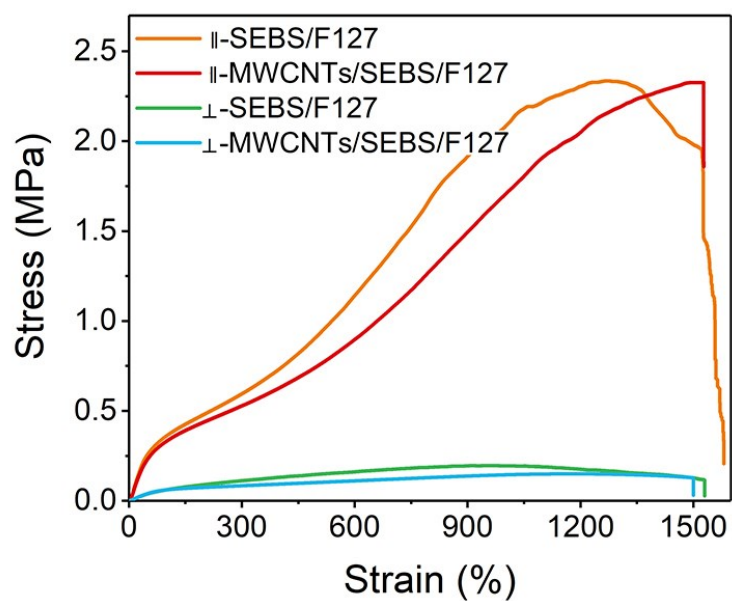

Figure S7. Strain-stress curves of SEBS/F127 and CNT/SEBS/F127 fiber films at parallel (||) and perpendicular ( $\perp$ ) loading directions.



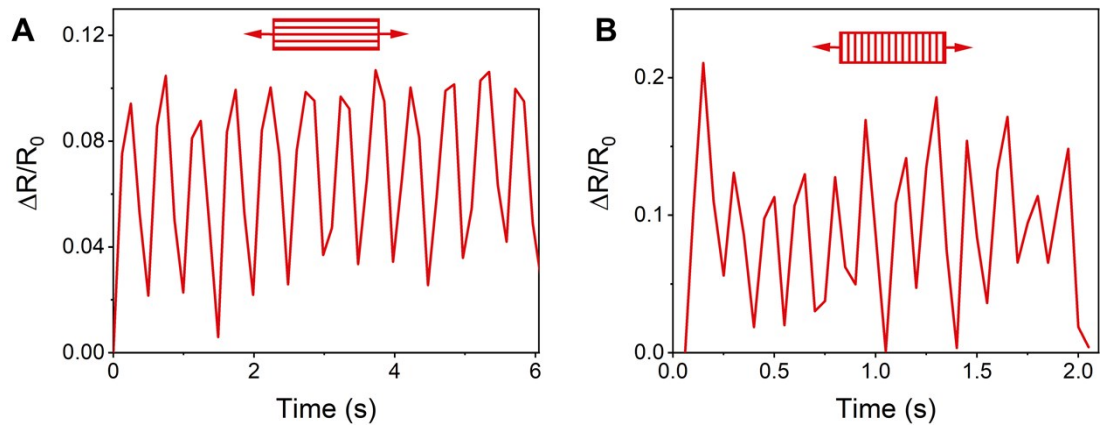

Figure S8. Minimal strain detection of CNT/SEBS/F127 in (A) parallel direction (~1.5%) and (B) perpendicular direction (~0.5%).
